# Supplementary material for: Hepatocyte-specific NR5A2 deficiency induces pyroptosis and exacerbates non-alcoholic steatohepatitis by downregulating ALDH1B1 expression
Source: Springer Nature journal article supplement (doi:10.1038/s41419-024-07151-1), 2024-10-23
Supplement: MOESM1 [file 41419_2024_7151_MOESM1_ESM.pdf]

## **Supplemental Information**

### **Hepatocyte-specific NR5A2 Deficiency Induces Pyroptosis and Exacerbates Non-alcoholic Steatohepatitis by Downregulating ALDH1B1 Expression**

Rong Zhao, Zizhen Guo, Kaikai Lu, Qian Chen, Farooq Riaz, Yimeng Zhou, Luyun Yang,  
Xiaona Cheng, Litao Wu, Kexin Cheng, Lina Feng, Sitong Liu, Xiaodan Wu, Minghua  
Zheng, Chunyan Yin, Dongmin Li

**Figure S1**

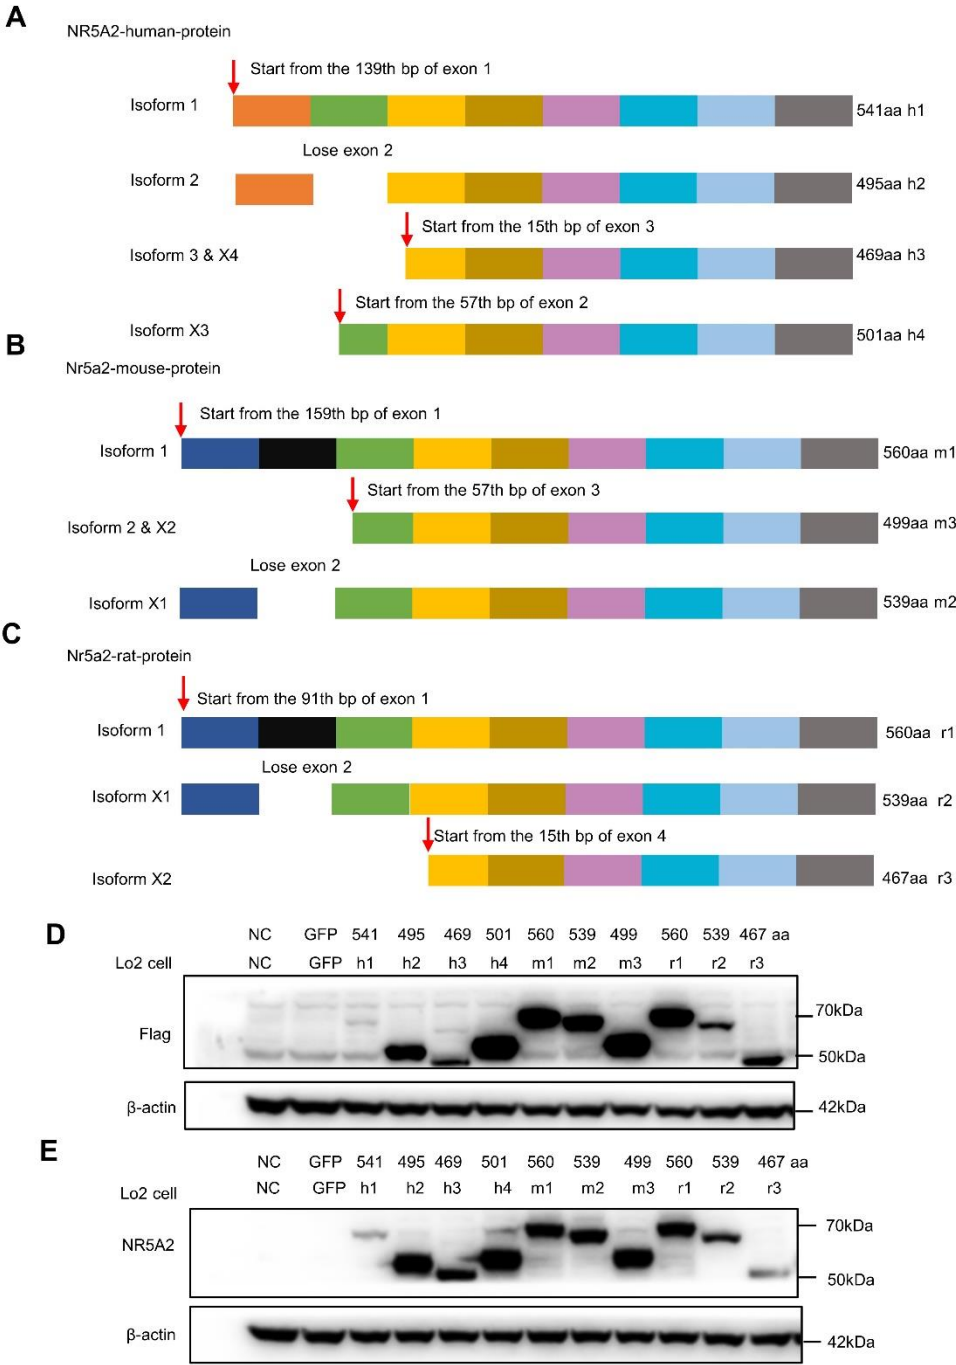

**Figure S1. The schematic representation and validation of NR5A2 isoforms across different species.**

(A-C) The schematic diagram of depicting distinct isoforms of NR5A2 across

various different species including human, mouse and rats. Different color rectangles represent individual exons, while identical colors across different species indicate a significant level of homology for these exons. The human NR5A2 isoforms encompass isoform 1, 2, 3&X4 (coding the same sequence) and X3. Isoform X1 and X2, new updated types, are not included in this study (A). Mouse Nr5a2 isoforms consist of isoform 1, 2 & X2(coding the same sequence), and X1 (B). Rat Nr5a2 isoforms include isoform 1, X1 and X2 (C). (D-E) Western blotting was conducted to detect different NR5A2 isoforms tagged with a flag sequence on the N-terminal using flag antibody (D) or NR5A2 antibody (E). The coding domain sequence (CDS) of NR5A2 different isoforms were cloned into pCDH\_EF1a-IRES-puro\_BsrG1 vector and transfected into LO2 cell line. After 36 hours, the protein collection and analysis were performed. Each lane is annotated with the amino acid numbers of NR5A2 different isoforms and serial number corresponding to Figure S1A-S1C.

**Figure S2**

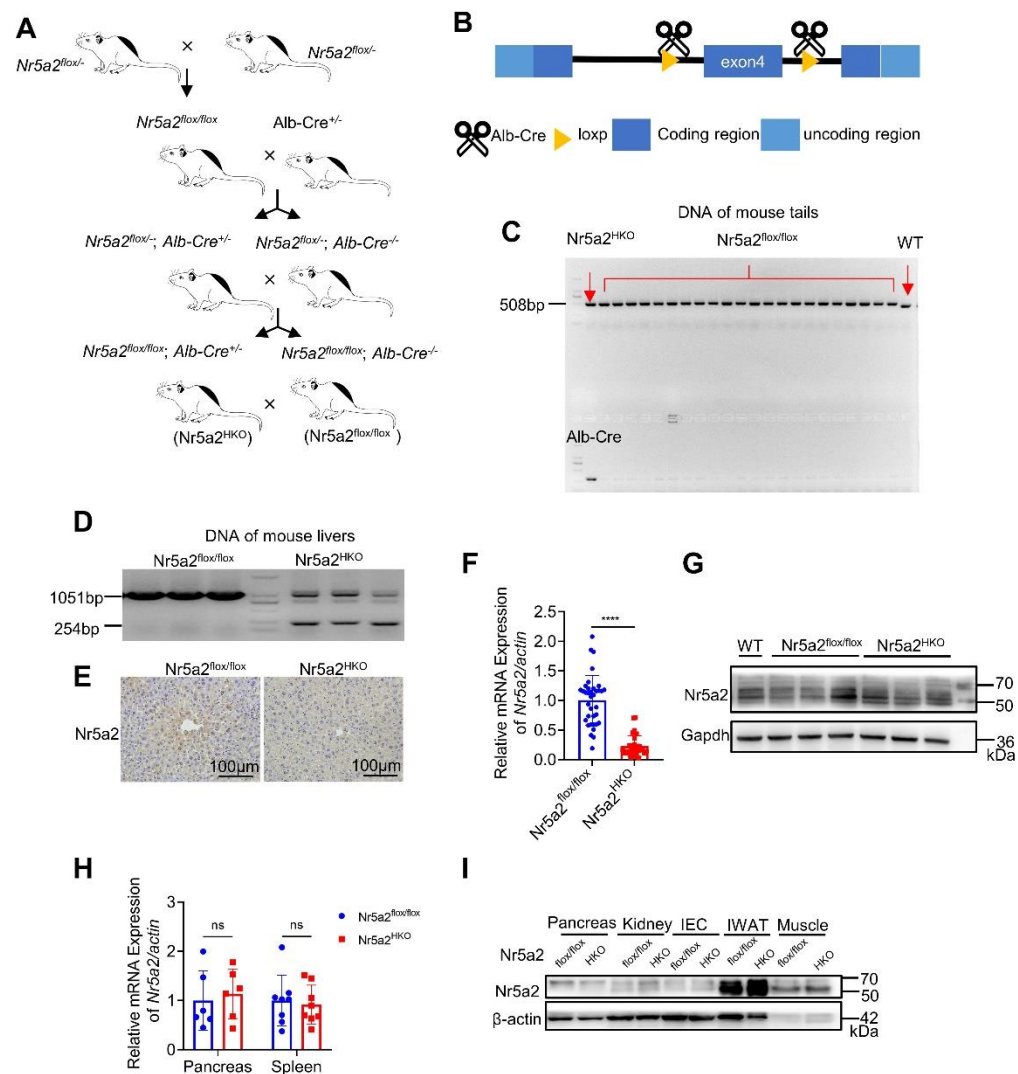

**Figure S2. The hepatocyte-specific knockout mouse of NR5A2 was established.**

(A) Breeding strategy for generating hepatocyte-specific knockout mice of *Nr5a2* (*Nr5a2<sup>HKO</sup>* mice) and their littermates.

(B) Schematic representation of *Nr5a2* knockout in *Nr5a2<sup>HKO</sup>* mice.

(C-D) *Nr5a2<sup>HKO</sup>* mice were genotyped using tail DNA (C) and liver DNA (D). Tail:

Nr5a2<sup>flox/flox</sup> mice: 508bp, Alb-Cre: negative. Wild type mice: 405bp, Alb-Cre: negative. Nr5a2<sup>HKO</sup> mice: 508bp, Alb-Cre: positive. Liver: Nr5a2<sup>flox/flox</sup> mice: 1051bp. Nr5a2<sup>HKO</sup> mice: 1051bp and 254bp (haploid Alb-Cre).

(E-G) Nr5a2 expression was detected by immunohistochemical staining (E), RT-qPCR (F) and western blotting (G) in the liver of Nr5a2<sup>flox/flox</sup> mice and Nr5a2<sup>HKO</sup> mice. N=36/group, \*\*\*\*p < 0.0001. Data are presented as means ± SD.

(H-I) Nr5a2 expression was detected in other organs via RT-qPCR (H) and western blotting (I) in the Nr5a2<sup>flox/flox</sup> mice and Nr5a2<sup>HKO</sup> mice (IEC: intestinal epithelial cell, IWAT: inguinal white adipose tissue). N=6-8/group, ns, not significant. Data are presented as means ± SD.

**Figure S3**

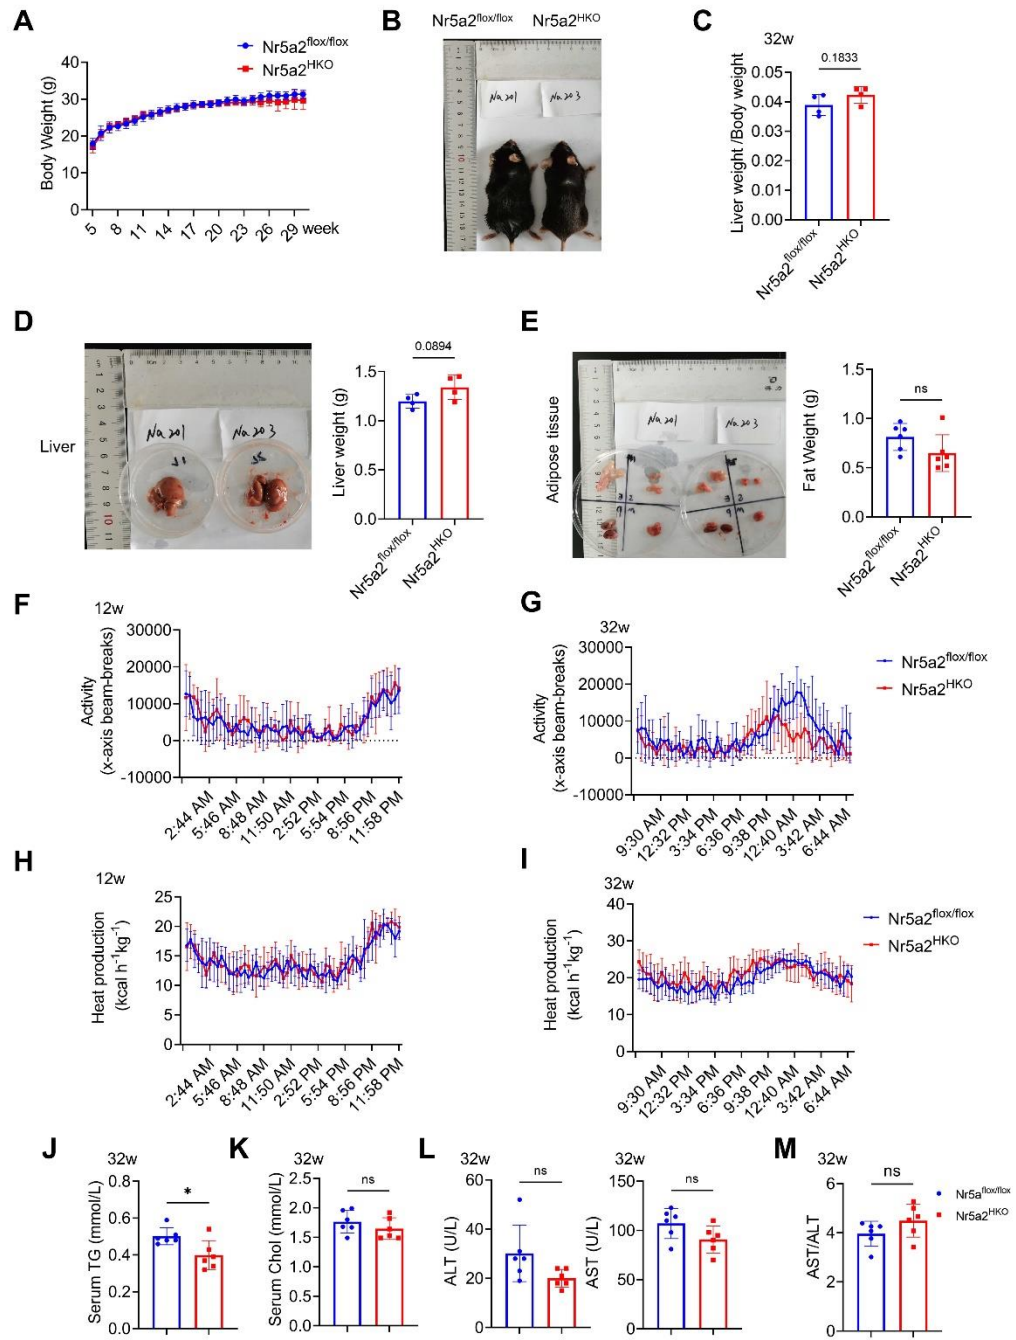

**Figure S3. The indifference phenotype in Nr5a2<sup>HKO</sup> mice model.**

Male Nr5a2<sup>flox/flox</sup> and Nr5a2<sup>HKO</sup> mice were fed regular diet for 12 weeks and 32 weeks, N=6/group, data are presented as means  $\pm$  SD.

(A) Body weight recording of 32-week-old Nr5a2<sup>HKO</sup> mice model.

(B-E) Body shape under anesthesia (B), ratio of liver weight to body weight (C), appearance and weight of liver (D) and adipose tissue (E) in Nr5a2<sup>HKO</sup> mice and their littermates at the age of 32 weeks (Na201: Nr5a2<sup>flox/flox</sup>, Na203: Nr5a2<sup>HKO</sup>). N=4/group (2 mice were excluded for liver perfusion with 4% polyformaldehyde dissolved in 0.01 M phosphate buffer solution), ns, not significant.

(F-G) The activity monitoring data in metabolism cage of 12-week-old (F) and 32-week-old (G) Nr5a2<sup>HKO</sup> mice and their littermates.

(H-I) The heat production monitoring data in metabolism cage of 12-week-old (H) and 32-week-old (I) Nr5a2<sup>HKO</sup> mice and their littermates.

(J-K) Serum TG (J) and cholesterol (K) of 32-week-old Nr5a2<sup>HKO</sup> mice and their littermates. ns, not significant, \*p < 0.05.

(L) ALT and AST of 32-week-old Nr5a2<sup>HKO</sup> mice and their littermates. ns, not significant.

(M) The ratio of AST to ALT of 32-week-old Nr5a2<sup>HKO</sup> mice and their littermates. ns, not significant.

**Figure S4**

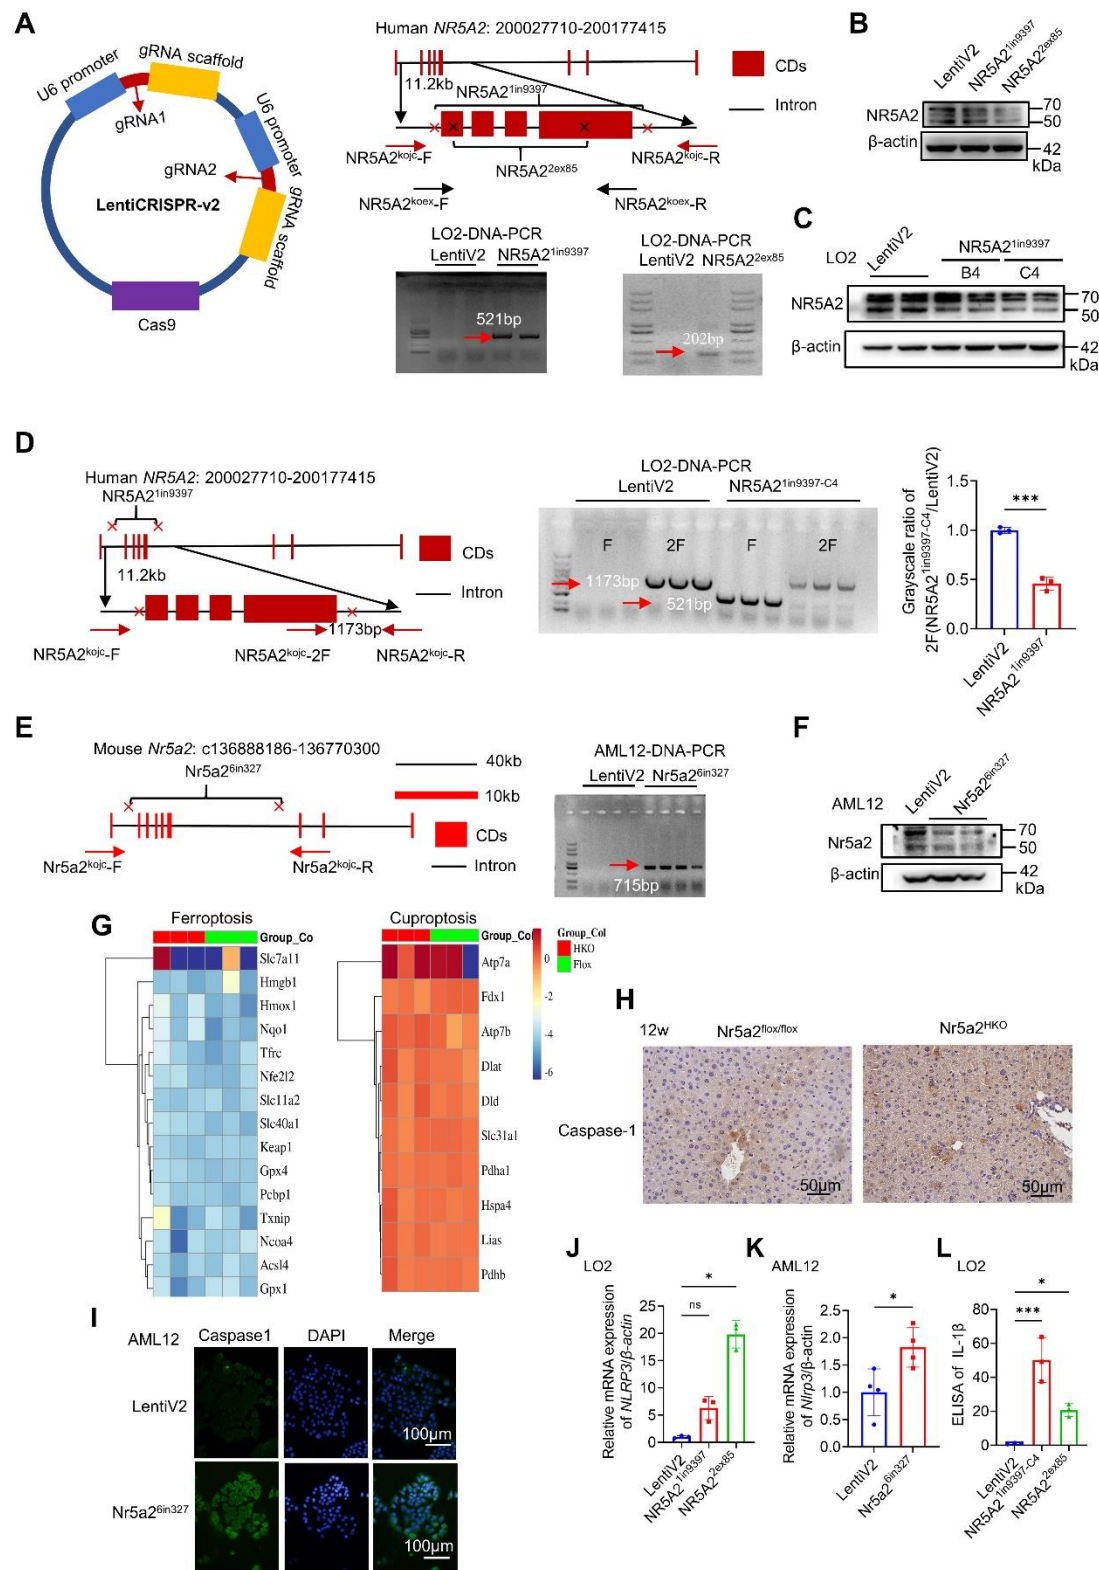



**Figure S4. The deficiency of NR5A2 led to the induction of pyroptosis in liver cells.**

(A) Identification of *NR5A2* knockout in the LO2 cell line genome. To achieve *NR5A2* knockout in the LO2 cell line, two guide RNAs were designed to remove a long fragment of *NR5A2*. The guide RNAs, *NR5A2*<sup>1in9397</sup>-gRNA1 and *NR5A2*<sup>1in9397</sup>-gRNA2, inserted into LentiCRISPR-v2 and targeted *NR5A2* intron 1 and intron 5 respectively. Primers located outside the cleavage site were utilized to confirm the successful removal of the long fragment (*NR5A2*<sup>kojc</sup>-F/R). The presence of bands at 521bp indicates a successful knockout, whereas a failed knockout would result in an 11.2kb PCR product that may not be amplified. *NR5A2*<sup>2ex85</sup>-gRNA1 and *NR5A2*<sup>2ex85</sup>-gRNA2 targeted *NR5A2* exon2 and exon 5, with verification design is similar to *NR5A2*<sup>1in9397</sup> (*NR5A2*<sup>koex</sup>-F + *NR5A2*<sup>koex</sup>-R:202bp).

(B) Western blotting analysis of *NR5A2* in the LO2-*NR5A2*<sup>1in9397</sup> and LO2-*NR5A2*<sup>2ex85</sup> cell lines.

(C) Protein detection of *NR5A2* in monoclonal cultivation of LO2-*NR5A2*<sup>1in9397</sup> cell line.

(D) Haploid knockout of *NR5A2* in LO2-*NR5A2*<sup>1in9397-C4</sup> cell line was identified through DNA analysis. Different forward primers (*NR5A2*<sup>kojc</sup>-F/2F) were designed and paired with the corresponding reverse primer (*NR5A2*<sup>kojc</sup>-R). The total amount of DNA was consistent across all experimental groups (*NR5A2*<sup>kojc</sup>-

2F + NR5A2<sup>kojc</sup>-R:1173bp). N=3/group, \*\*\*p < 0.001. Data are presented as means ± SD.

(E) Design and identification of *Nr5a2* knockout in the AML12 cell line followed a similar approach as NR5A2<sup>1in9397</sup> (Nr5a2<sup>kojc</sup>-F + Nr5a2<sup>kojc</sup>-R: 715bp).

(F) Western blotting analysis of Nr5a2 in the AML12-Nr5a2<sup>6in327</sup> cell line.

(G) Heatmaps were generated to cluster genes involved in ferroptosis and cuproptosis pathways using RNA-seq data from 5-week-old Nr5a2<sup>HKO</sup> mice model, N=3/group.

(H) Immunohistochemical staining of Caspase1 expression patterns in the liver of 5-week-old Nr5a2<sup>HKO</sup> mice and their littermates.

(I) Immunofluorescence analysis demonstrated total Caspase1 levels in the AML12-Nr5a2<sup>6in327</sup> cell line compared to its negative control.

(J-K) *NLRP3* mRNA expression level was determined in the LO2-NR5A2<sup>1in9397</sup>

(J), LO2-NR5A2<sup>2ex85</sup> (J) and AML12-Nr5a2<sup>6in327</sup> (K) cell lines, respectively. LO2: N=3/group, AML12: N=4/group, ns, not significant, \*p < 0.05. Data are presented as means ± SD.

(L) ELISA of IL-1β in the cell supernatant of LO2-NR5A2<sup>1in9397</sup>-C4, LO2-NR5A2<sup>2ex85</sup> and their control cell line LO2-LentiV2. N=3/group, \*p < 0.05, \*\*\*p < 0.001. Data are presented as means ± SD.

**Figure S5**

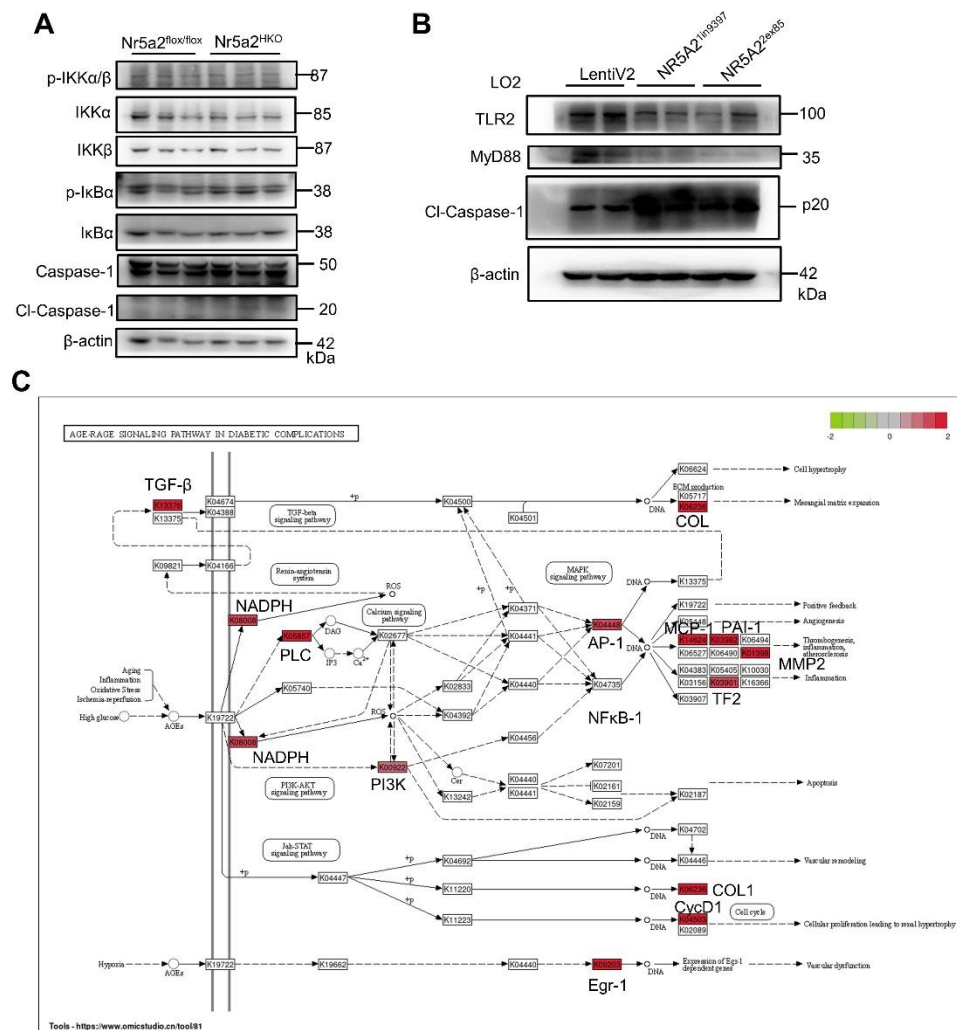

**Figure S5. ROS serves as a prominent stimulus for the activation of the NF-κB pathway in hepatocytes with NR5A2 deficiency.**

(A) Western blotting analysis was performed to examine the expression of molecules involved in the NF-κB pathway and pyroptosis in the livers of Nr5a2<sup>fllox/fllox</sup> and Nr5a2<sup>HKO</sup> mice.

(B) The protein levels of TLR2 and MYD88, two key molecules involved in NF-

κB activation, were assessed in the LO2-NR5A2<sup>1in9397</sup> and LO2-NR5A2<sup>2ex85</sup> cell lines.

(C) OmicStudio tool was utilized to visualize the differential expression genes in the AGE-RAGE signaling pathway based on RNA-seq data from 5-week-old Nr5a2<sup>HKO</sup> mice model (<https://www.omicstudio.cn/tool>).

**Figure S6**

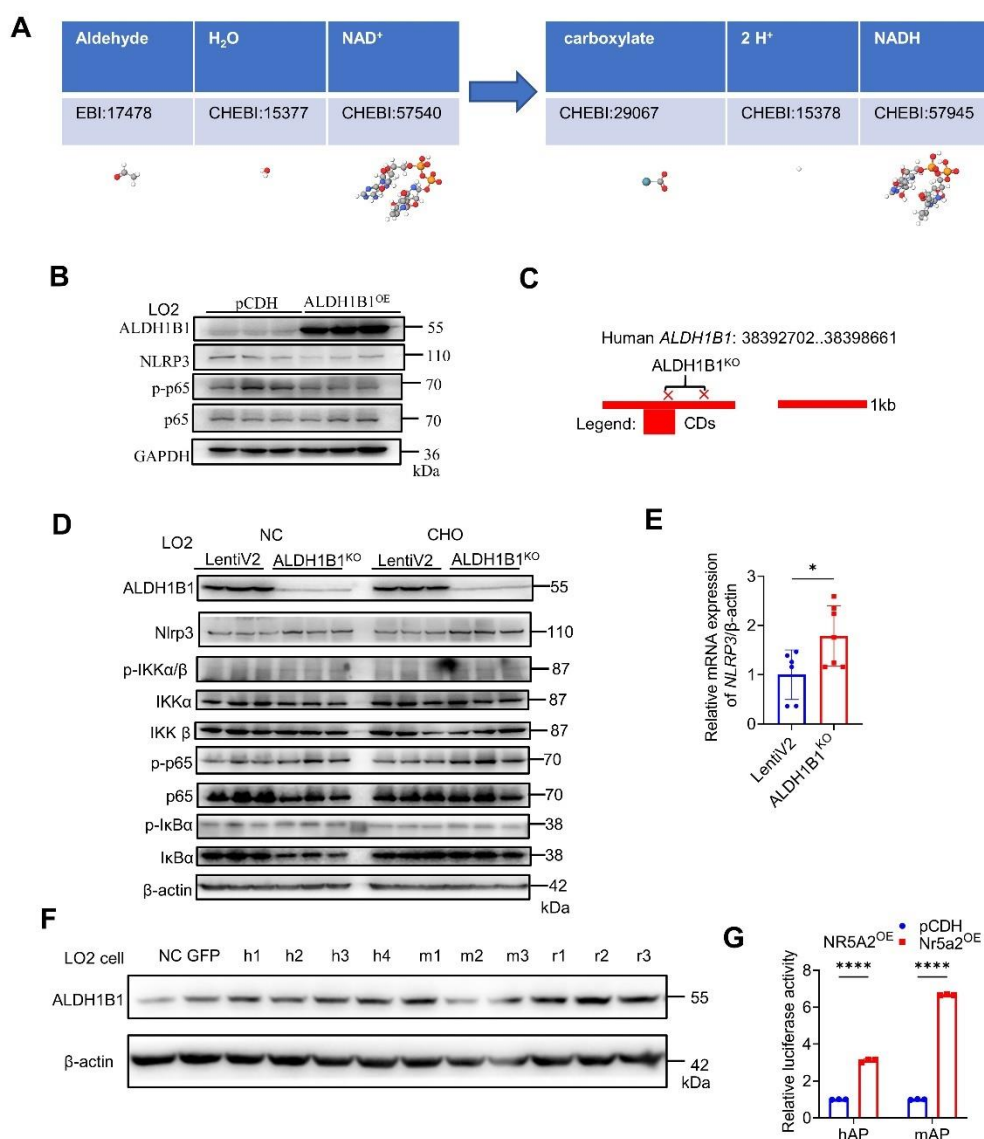

**Figure S6. ALDH1B1 has the ability to inhibit NF-κB pathway and can be transcriptionally promoted by NR5A2.**

(A) The conversion of aldehyde into carboxylate is facilitated by ALDH1B1.

(B) Western blotting was performed to detect the activation of the NF-κB pathway in the LO2 cell line overexpressing ALDH1B1 (pCDH refers to pCDH\_EF1a-IRES-puro\_BsrG1 vector).

(C) A schematic diagram illustrating the design of *ALDH1B1* knockout in the LO2 cell line (LO2-*ALDH1B1*<sup>KO</sup>).

(D) Western blotting was performed to detect the activation of the of the NF- $\kappa$ B pathway in the LO2-*ALDH1B1*<sup>KO</sup> cell line.

(E) The mRNA level of *NLRP3* was assessed in the LO2-*ALDH1B1*<sup>KO</sup> cell line.

N=6-7/group, \*p < 0.05. Data are presented as means  $\pm$  SD.

(F) The *ALDH1B1* was upregulated in LO2 cell line overexpressing NR5A2. The samples are the same as those used in figures S1D and S1E.

(G) The transcriptional activity of NR5A2 on the promoter region of *ALDH1B1* was analyzed using a dual-luciferase reporter system. NR5A2<sup>OE</sup> refers to overexpression of human and mouse full-length *NR5A2* in the HEK293T cell line, respectively. h(m)AP: human (mouse) *ALDH1B1* promoter region. N=3/group, \*\*\*\*p < 0.0001. Data are presented as means  $\pm$  SD.

**Table S1 Basic information of included patients**

| Item                                 | Control        | NASH           |
|--------------------------------------|----------------|----------------|
| Sample size                          | 6              | 6              |
| Age (years)                          | 32.33 (3.921)  | 31.67 (3.630)  |
| Body mass index (kg/m <sup>2</sup> ) | 29.08 (2.193)  | 38.33 (3.446)  |
| AST (U/L)                            | 54.25 (28.26)  | 59.13 (16.17)  |
| ALT (U/L)                            | 27.5 (5.309)   | 114.3 (28.49)  |
| Triglycerides (mmol/L)               | 1.278 (0.1549) | 4.287 (1.264)  |
| Total cholesterol (mmol/L)           | 4.698 (0.3887) | 5.477 (0.5503) |
| HDL-C (mmol/L)                       | 1.092 (0.141)  | 0.805 (0.0746) |
| LDL-C (mmol/L)                       | 2.663 (0.3006) | 2.94 (0.2817)  |

<sup>a</sup> The inclusion criteria of NASH patients were as follows: a) The recommended alcohol intake is less than 20g per week for men and less than 10g per week for women. b) liver biopsy shows that there is steatosis with or without fibrosis. c) hepatitis virus is negative.

**Table S2 Primer sequences for PCR**

| Primer name               | Primer sequence (5' to 3') |
|---------------------------|----------------------------|
| Nr5a2_P1                  | TTTATACTTTGCAACGCTTCTCC    |
| Nr5a2_P2                  | AATGTCGCCTTTGCCTAATGA      |
| Nr5a2_P5                  | GTGCCAGTCCCTTACAGC         |
| Nr5a2_P6                  | GTTCCAACCTTGCAGCACAGATTC   |
| Mus-Cre-F                 | CAGCATTGCTGTCACTTGGTC      |
| Mus-Cre-R                 | ATTTGCCTGCATTACCGGTCG      |
| NR5A2 <sup>kojc</sup> -F  | CATGGACCAAGAAGTCGCTA       |
| NR5A2 <sup>kojc</sup> -2F | CTGTAAGGGCCGACCGAATGCG     |
| NR5A2 <sup>kojc</sup> -R  | CCAACCTAATGTCAAGGCAA       |
| NR5A2 <sup>koex</sup> -F  | GCTGGGCTTCCGGACCGAC        |
| NR5A2 <sup>koex</sup> -R  | CTTAAGTTCTCTGAAGAAG        |
| Nr5a2 <sup>kojc</sup> -F  | ATGATTTCTGCTGTAAGCCAAAG    |
| Nr5a2 <sup>kojc</sup> -R  | GTTCTCCAGTAACCAGGAAGATTG   |
| CDS-hALDH1B1-F:           | ATGCTGCGCTTCCTGGCACC       |
| CDS-hALDH1B1-R:           | TTACGAGTTCTTCTGAGGAACC     |

**Table S3 gRNA sequences for gene knockout**

| gRNA                             | gRNA sequence (5' to 3') |
|----------------------------------|--------------------------|
| NR5A2 <sup>1in9397</sup> -gRNA1  | GCCTCTGCTTGGTGAAGCCGG    |
| NR5A2 <sup>1in9397</sup> - gRNA2 | GTGTAGCTCTTAGTTTGGGG     |
| NR5A2 <sup>2ex85</sup> - gRNA1   | GGGACTGGCTCGATCGCATG     |
| NR5A2 <sup>2ex85</sup> - gRNA2   | GGCCTATTTGCAGCAAGAGC     |
| Nr5a2 <sup>6in327</sup> - gRNA1  | GGGTCTGTTAAGGACCATTC     |
| Nr5a2 <sup>6in327</sup> - gRNA2  | GCTAAGTGGATCTAATAACA     |
| ALDH1B1 <sup>KO</sup> - gRNA1    | GGTAGGGTTGACCGTCGGGA     |
| ALDH1B1 <sup>KO</sup> - gRNA2    | GAAGCCCTGTTCTTCAACAT     |

**Table S4 Primer sequences for clone**

| Primer name                | Primer sequence (5' to 3')                                  |
|----------------------------|-------------------------------------------------------------|
| pCDH-Flag                  | GCTGTGACCGGCGCCTACTCTAGACAAC<br>ATGGATTACAAGGACGACGATGACAAG |
| Flag-hNR5A2-Iso1-F         | ACAAGGACGACGATGACAAGTCTTCTAATT<br>CAGATACTGG                |
| hNR5A2- Iso2-R             | CCATTTTAAATTGAGACACAATAGGTGTAAG<br>TCCGTG                   |
| hNR5A2- Iso2-F             | CACGGACTTACACCTATTGTGTCTCAATTTA<br>AAATGG                   |
| Flag-hrNR5A2-<br>Iso3/X2-F | ACAAGGACGACGATGACAAGGTGAATTA<br>CTCCTATGATGAAGATCTG         |
| Flag-hmNR5A2-<br>IsoX3/2-F | ACAAGGACGACGATGACAAGCTGCCCAA<br>GTGGAGACGG                  |
| pCDH-hNR5A2-R              | GTACACTCGAGAGCGCTGGATCCTCATG<br>CTCTTTTGGCATGCAACATTTC      |
| Flag-mNr5a2-Iso1-F         | ACAAGGACGACGATGACAAG TCTGCTAGT<br>TTGGATACTG                |
| mNR5A2- IsoX1-R            | GGTCCGGAAGCCCAGCACCAATAGCTGTA<br>AGTC                       |
| mNR5A2- IsoX1-F            | GACTTACAGCTATTGGTGCTGGGCTTCCG<br>GACC                       |
| pCDH-mNr5a2-R              | GTACACTCGAGAGCGCTGGATCCTCAGG<br>CTCTTTTGGCATGCAGC           |
| Flag-rNr5a2-F              | ACAAGGACGACGATGACAAGTCTGCTAGT<br>TCGATTACTGG                |
| pCDH-rNr5a2-R              | GTACACTCGAGAGCGCTGGATCCTCAGG<br>CTCTTTTGGCGTGCAGC           |
| PCDH-Flag-hALD-F           | ACAAGGACGACGATGACAAGCTGCGCTT<br>CCTGGCAC                    |



---

|                   |                                                              |
|-------------------|--------------------------------------------------------------|
| PCDH-hALD-R       | GTACACTCGAGAGCGCTGGATCCTCACG<br>AGTTCTTCTGAGGAAC             |
| PCDH-Flag-mAld-F  | ACAAGGACGACGATGACAAGCTGACTGC<br>CCGACTCTTGCTG                |
| PCDH-mAld-R       | GTACACTCGAGAGCGCTGGATCCTCAGG<br>AATTCTTCTCGGGAAC             |
| pCDH-neo-Flag-F   | GAATTCGAATTTAAATCGGATCCGCCACC<br>ATGGATTACAAGGACGACGATGACAAG |
| pCDH-neo-hNR5A2-R | GGGAGGGAGAGGGGCGCGGCCGCTGTA<br>CATCATGCTCTTTTGGCATGCAACATTTT |
| pCDH-neo-mNr5a2-R | GGGAGGGAGAGGGGCGCGGCCGCTGT<br>ACATCAGGCTCTTTTGGCATGCAGC      |
| pCDH-neo-GFP- F   | GAATTCGAATTTAAATCGGATCCGCCACC<br>ATGGTGAGCAAGGGCGAGGAG       |
| pCDH-neo-GFP-R    | GGGAGGGAGAGGGGCGCGGCCGCTGTA<br>CATCACTTGTACAGCTCGTCCATG      |
| pCDH-neo-hALD-R   | GGGAGGGAGAGGGGCGCGGCCGCTGTA<br>CATCACGAGTTCTTCTGAGGAAC       |
| pCDH-neo-mAld-R   | GGGAGGGAGAGGGGCGCGGCCGCTGTA<br>CATCAGGAATTCTTCTCGGGAAC       |
| mAP-F             | CTCTGGCCTAACTGGCCGGTACCCAACCA<br>AGAACTCTGCAGG               |
| mAP-R             | CAAGCTTACTTAGATCGCAGATCTCTAGTAT<br>CAGCGTTCTCCGGTCAG         |
| 2mAP-F            | CTCTGGCCTAACTGGCCGGTACCCCTGAC<br>AGCTTCAGTTACAGGGACAG        |
| 2mAP-R            | CTGTCCCTGTAAGTGAAGCTGTCAGGGGT<br>ACCGGCCAGTTAGGCCAGAG        |
| 3mAP-F            | CTCTGGCCTAACTGGCCGGTACCCCAGCA<br>GTAGGGGATTGCACAATAGC        |
| 3mAP-R            | GCTATTGTGCAATCCCCTACTGCTGGGGTA<br>CCGGCCAGTTAGGCCAGAG        |
| mAP-mut1-F        | GTCCATGGCGTAGAGCGGAGC                                        |
| mAP-mut1-R        | GCTCCGCTCTACGCCATGGAC                                        |
| mAP-mut3-F        | GGTGTCGTACAAATCCAC                                           |
| mAP-mut3-R        | GTGGATTTGTACGACACC                                           |
| hAP-F             | CTCTGGCCTAACTGGCCGGTACCATTCTC<br>TGTATTCTTCACTGGTC           |
| hAP-R             | CAAGCTTACTTAGATCGCAGATCTGCAGGC<br>TCGGGCTCCGGTTC             |
| 2hAP-F            | CTCTGGCCTAACTGGCCGGTACCGCGTGC<br>CCGCCTTCCACATCCGG           |
| 2hAP-R            | CCGGATGTGGAAGGCGGGCACGCGGTAC<br>CGGCCAGTTAGGCCAGAG           |

---

|             |                                                  |
|-------------|--------------------------------------------------|
| 3hAP-F      | CTCTGGCCTAACTGGCCGGTACCCGGCGA<br>CAGGACGTAGGCAGC |
| 3hAP-R      | GCTGCCTACGTCCTGTCGCCGGGTACCGG<br>CCAGTTAGGCCAGAG |
| hAP-mut2-F  | GGGAGGAGCGGCGTAGGCCGGCGACAG                      |
| hAP-mut2-R  | CTGTCGCCGGCCTACGCCGCTCCTCCC                      |
| hAP-mut3-F  | GACAGGACGTACTCAGCGCCCCAG                         |
| hAP-mut3-R  | CTGGGGCGCTGAGTACGTCCTGTC                         |
| hAP-mut3-1F | GGCAGCGCCCCACTCGCAGGCGGAG                        |
| hAP-mut3-1R | CTCCGCCTGCGAGTGGGGCGCTGCC                        |

**Table S5 Antibodies and materials**

| ANTIBODIES                                                                    | SOURCE                    | IDENTIFIER      |
|-------------------------------------------------------------------------------|---------------------------|-----------------|
| Anti-NR5A2, mouse monoclonal                                                  | R&D systems               | Cat# PPH2325    |
| Anti-NR5A2, goat polyclonal                                                   | Everest                   | Cat# EB12283    |
| Anti-ALDH1B1, mouse monoclonal                                                | Santa Cruz                | Cat# SC-393583  |
| Anti-NLRP3, rabbit polyclonal                                                 | Proteintech               | Cat# 19771-1-AP |
| Anti-Phospho-NF- $\kappa$ B p65 (Ser536), rabbit recombinant monoclonal, 93H1 | Cell Signaling Technology | Cat# 3033       |
| Anti-NF- $\kappa$ B p65, rabbit monoclonal, D14E12                            | Cell Signaling Technology | Cat# 8242       |
| Anti-Caspase-1, rabbit polyclonal                                             | Cell Signaling Technology | Cat# 2225       |
| Anti-Caspase-1, rabbit polyclonal                                             | Proteintech               | Cat# 22915-1-AP |
| Anti-Phospho-IKK $\alpha$ / $\beta$ (Ser176/180), rabbit monoclonal, 16A6     | Cell Signaling Technology | Cat# 2697       |
| Anti-IKK $\alpha$ , rabbit monoclonal                                         | Cell Signaling Technology | Cat# 2682       |
| Anti-IKK $\beta$ , rabbit monoclonal, 2C8                                     | Cell Signaling Technology | Cat# 2370       |
| Anti-Phospho-IkB $\alpha$ (Ser32), rabbit monoclonal, 14D4                    | Cell Signaling Technology | Cat# 2859       |
| Anti-IkB $\alpha$ , mouse monoclonal, L35A5                                   | Cell Signaling Technology | Cat# 4814       |
| Anti-GSDMD, rabbit monoclonal                                                 | Abcam                     | Cat# ab209845   |
| Anti-Pro IL-1 $\beta$ , rabbit polyclonal                                     | Proteintech               | Cat# 16806-1-AP |
| Anti-mature IL-1 $\beta$ , rabbit monoclonal                                  | Abways                    | Cat# CY5087     |
| Cleaved-IL-1 $\beta$ , rabbit polyclonal                                      | Affinity                  | Cat #AF4006     |
| Anti-GAPDH, rabbit monoclonal                                                 | BOSRER                    | Cat# BM3874     |

|                                                                |             |                  |
|----------------------------------------------------------------|-------------|------------------|
| Anti- $\beta$ -actin, mouse monoclonal                         | ZENBIO      | Cat# 200068-8F10 |
| Anti-MyD88, rabbit polyclonal                                  | Immunoway   | Cat# YT2928      |
| Anti-TLR2, rabbit monoclonal                                   | Abcam       | Cat# Ab191458    |
| CoraLite488-conjugated Goat Anti-Mouse IgG(H+L), polyclonal    | Proteintech | Cat# SA00013-1   |
| CoraLite594 – conjugated Goat Anti-Rabbit IgG(H+L), polyclonal | Proteintech | Cat# SA00013-4   |

| MATERIALS                    | SOURCE | IDENTIFIER |
|------------------------------|--------|------------|
| Bacterial and Virus Strains  |        |            |
| DH5 $\alpha$ Competent Cells | sangon | B528413    |

| Experimental Models: Cell Lines |                             |                |
|---------------------------------|-----------------------------|----------------|
| LO2                             | ATCC, Gift from Yilei Zhang | Cat# CRL-2706  |
| AML12                           | ATCC                        | Cat# CRL-2254  |
| 293T                            | ATCC                        | Cat# CRL-11268 |

| Recombinant DNA                    |                         |     |
|------------------------------------|-------------------------|-----|
| pCDH_EF1a-IRES-puro_BsrG1          | Gift from Lianying Jiao | N/A |
| pCDH-EF1a-Flag-hNR5A2-Iso1-puro    | This Study              | N/A |
| pCDH-EF1a-Flag-hNR5A2-Iso2-puro    | This Study              | N/A |
| pCDH-EF1a-Flag-hNR5A2-Iso3/X4-puro | This Study              | N/A |
| pCDH-EF1a-Flag-hNR5A2-IsoX3-puro   | This Study              | N/A |
| pCDH-EF1a-Flag-mNr5a2-Iso1-puro    | This Study              | N/A |
| pCDH-EF1a-Flag-mNr5a2-Iso2/X2-puro | This Study              | N/A |
| pCDH-EF1a-Flag-mNr5a2-IsoX1-puro   | This Study              | N/A |
| pCDH-EF1a-Flag-rNr5a2-Iso1-puro    | This Study              | N/A |
| pCDH-EF1a-Flag-rNr5a2-IsoX1-puro   | This Study              | N/A |
| pCDH-EF1a-Flag-rNr5a2-IsoX2-puro   | This Study              | N/A |
| pCDH-EF1a-Flag-hALD-puro           | This Study              | N/A |
| pCDH-EF1a-Flag-mAld-puro           | This Study              | N/A |
| pCDH-CMV-MCS-EF1-Neo               | Gift from Lianying Jiao | N/A |
| pCDH-CMV-Flag-hNR5A2-Iso1-Neo      | This Study              | N/A |
| pCDH-CMV-Flag-hNR5A2-Iso2-Neo      | This Study              | N/A |
| pCDH-CMV-Flag-hNR5A2-Iso3/X4-Neo   | This Study              | N/A |
| pCDH-CMV-Flag-hNR5A2-IsoX3-Neo     | This Study              | N/A |
| pCDH-CMV-Flag-mNr5a2-Iso1-Neo      | This Study              | N/A |

|                                                |                                  |                    |
|------------------------------------------------|----------------------------------|--------------------|
| pCDH-CMV-Flag-mNr5a2-Iso2/X2-Neo               | This Study                       | N/A                |
| pCDH-CMV-Flag-mNr5a2-IsoX1-Neo                 | This Study                       | N/A                |
| pCDH-CMV-GFP-Neo                               | Gift from Lianying Jiao          | N/A                |
| pCDH-CMV-Flag-hALD-Neo                         | This Study                       | N/A                |
| pCDH-CMV-Flag-mAld-Neo                         | This Study                       | N/A                |
| lentiCRISPR v2                                 | Addgene, Gift from Lianying Jiao | RRID:Addgene_52961 |
| pGL4.35[ <i>luc2P/9XGAL4UAS/Hygro</i> ] Vector | Promega                          | Cat# E1370         |
| pGL4.35-hAP                                    | This Study                       | N/A                |
| pGL4.35-2hAP                                   | This Study                       | N/A                |
| pGL4.35-3hAP                                   | This Study                       | N/A                |
| pGL4.35-mAP                                    | This Study                       | N/A                |
| pGL4.35-2mAP                                   | This Study                       | N/A                |
| pGL4.35-3mAP                                   | This Study                       | N/A                |
| pGL4.35-hAP-mut2                               | This Study                       | N/A                |
| pGL4.35-hAP-mut3                               | This Study                       | N/A                |
| pGL4.35-mAP-mut1                               | This Study                       | N/A                |
| pGL4.35-mAP-mut3                               | This Study                       | N/A                |
| pRL-TK vector                                  | Addgene                          | Cat# E2241         |
| psPAX2                                         | Addgene, Gift from Lianying Jiao | RRID:Addgene_12260 |
| pMD2.G                                         | Addgene, Gift from Lianying Jiao | RRID:Addgene_12259 |

**Table S6 Primer sequences for RT-qPCR**

| Primer name    | Primer sequence (5' to 3') |
|----------------|----------------------------|
| Mus_Nr5a2-P1   | TGTGGCGATAAAGTGTCTGGG      |
| Mus_Nr5a2-P2   | ATCGACAGTAGGGACATCGT       |
| Homo_NR5A2-F   | CTTTGTCCCGTGTGTGGAGAT      |
| Homo_NR5A2-R   | GTCGGCCCTTACAGCTTCTA       |
| Mus_Nr5a2-F    | GGGGCAGAAATAAGTTTGGGC      |
| Mus_Nr5a2-R    | TTGGAGGCGGAATGAATGTTC      |
| Aldh1b1-mus-F  | GACATGGAGCATGCCGTAGA       |
| Aldh1b1-mus-R  | GAGAAGCTTTGCCCCTTCCT       |
| ALDH1B1-homo-F | GGTGAACATCATCACGGGGT       |
| ALDH1B1-homo-R | GAATCGCCAGCTGCTTTCTG       |
| SLC27A1-homo-F | ATGGCTATGTCAGCGAGAGC       |
| SLC27A1-homo-R | CTGGAACAGCCACCCCATAG       |

---

|               |                         |
|---------------|-------------------------|
| hum-actin-F   | GAGAAAATCTGGCACACACC    |
| hum-actin-R   | GGATAGCACAGCCTGGATAGCAA |
| Mus-actin-F   | GGCTGTATTCCCCTCCATCG    |
| Mus-actin-R   | CCAGTTGGTAACAATGCCATGT  |
| hum-TGFβ-F    | GGCCAGATCCTGTCCAAGC     |
| hum-TGFβ-R    | GTGGGTTTCCACCATTAGCAC   |
| Slc27a1-mus-F | CGCTTTCTGCGTATCGTCTG    |
| Slc27a1-mus-R | GATGCACGGGATCGTGTCT     |
| Got2-mus-F    | GGACCTCCAGATCCCATCCT    |
| Got2-mus-R    | GGTTTTCCGTTATCATCCCGGTA |
| CD36-mus-F    | GGAGCCATCTTTGAGCCTTCA   |
| CD36-mus-R    | GAACCAAAGTGGGAATGGATCT  |
| Fasn-mus-F    | GGAGGTGGTGATAGCCGGTAT   |
| Fasn-mus-R    | TGGGTAATCCATAGAGCCAG    |
| Scd1-mus-F    | TTCTTGCGATACTCTGGTGC    |
| Scd1-mus-R    | CGGGATTGAATGTTCTTGTCGT  |
| Dgat 2-mus-F  | GCGCTACTTCCGAGACTACTT   |
| Dgat2 -mus-R  | GGGCCTTATGCCAGGAACT     |
| Ppara-mus-F   | AGAGCCCCATCTGTCCTCTC    |
| Ppara-mus-R   | ACTGGTAGTCTGCAAAACCAAA  |
| Cpt1a-mus-F   | CTCCGCCTGAGCCATGAAG     |
| Cpt1a-mus-R   | CACCAGTGATGATGCCATTCT   |
| Acadl-mus-F   | TCTTTTCCTCGGAGCATGACA   |
| Acadl-mus-R   | GACCTCTCTACTCACTTCTCCAG |
| Acadm-mus-F   | AGGGTTTAGTTTTGAGTTGACGG |
| Acadm-mus-R   | CCCCGCTTTTGTTCATATTCCG  |
| Ucp2-mus-F    | ATGGTTGGTTTCAAGGCCACA   |
| Ucp2-mus-R    | CGGTATCCAGAGGGAAAGTGAT  |
| Acox1-mus-F   | GGATGGTAGTCCGGAGAACA    |
| Acox1-mus-R   | AGTCTGGATCGTTCAGAATCAAG |
| Srebf1-mus-F  | GCAGCCACCATCTAGCCTG     |
| Srebf1-mus-R  | CAGCAGTGAGTCTGCCTTGAT   |
| Hmgcr-mus-F   | AGCTTGCCCGAATTGTATGTG   |
| Hmgcr-mus-R   | TCTGTTGTGAACCATGTGACTTC |
| Cyp7a1-mus-F  | GGGATTGCTGTGGTAGTGAGC   |
| Cyp7a1-mus-R  | GGTATGGAATCAACCCGTTGTC  |
| Abcg5-mus-F   | AGGGCCTCACATCAACAGAG    |
| Abcg5-mus-R   | GCTGACGCTGTAGGACACAT    |
| Tnfa-mus-F    | ATCGGTCCCCAAAGGGAT      |
| Tnfa-mus-R    | TGTCTTTGAGATCCATGC      |
| Il1β-mus-F    | CAGGCAGTATCACTCATT      |
| Il1β-mus-R    | GGAGCCTGTAGTGCAGTT      |
| Tgfβ-mus-F    | AACTATTGCTTCAGCTCC      |
| Tgfβ-mus-R    | CAGAAGTTGGCATGGTAGC     |

---

---

|                     |                         |
|---------------------|-------------------------|
| $\alpha$ -Sma-mus-F | CCAACCGGGAGAAAATGA      |
| $\alpha$ -Sma-mus-R | CCAGACGCATGATGGCAT      |
| Mmp2-mus-F          | CCCTTCACTTTCCTGGGCAA    |
| Mmp2-mus-R          | AAGTTCTTGGTGTAGGTGTA    |
| Timp2-mus-F         | TGAACCACAGGTACCAGA      |
| Timp2-mus-R         | TCTTGATGCAGGCGAAGAA     |
| Ccl2-mus-F          | GATCCCAATGAGTAGGCT      |
| Ccl2-mus-R          | GATGCATTAGCTTCAGAT      |
| Nlrp3-mus-F         | ATTACCCGCCCCGAGAAAGG    |
| Nlrp3-mus-F         | TCGCAGCAAAGATCCACACAG   |
| NLRP3-homo-F        | CGTGAGTCCCATTAAGATGGAGT |
| NLRP3-homo-R        | CCCGACAGTGGATATAGAACAGA |

---
